# Supplementary material
Source: PubMed Central journal article supplement (PMC8282488)

# THE LANCET Microbe

## Supplementary appendix

This appendix formed part of the original submission. We post it as supplied by the authors.

Supplement to: Lim W, Mak L, Leung GM, Cowling BJ, Peiris M. Comparative immunogenicity of mRNA and inactivated vaccines against COVID-19. *Lancet Microbe* 2021; published online July 15. [https://doi.org/10.1016/S2666-5247\(21\)00177-4](https://doi.org/10.1016/S2666-5247(21)00177-4).

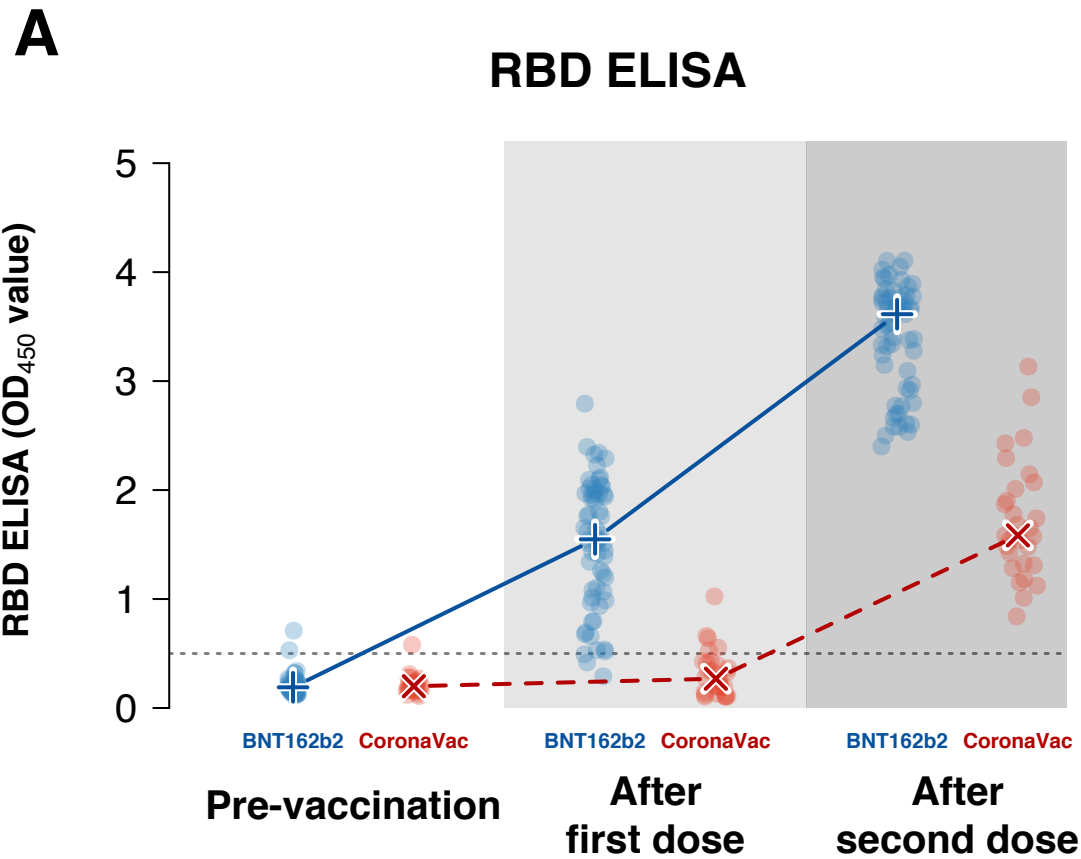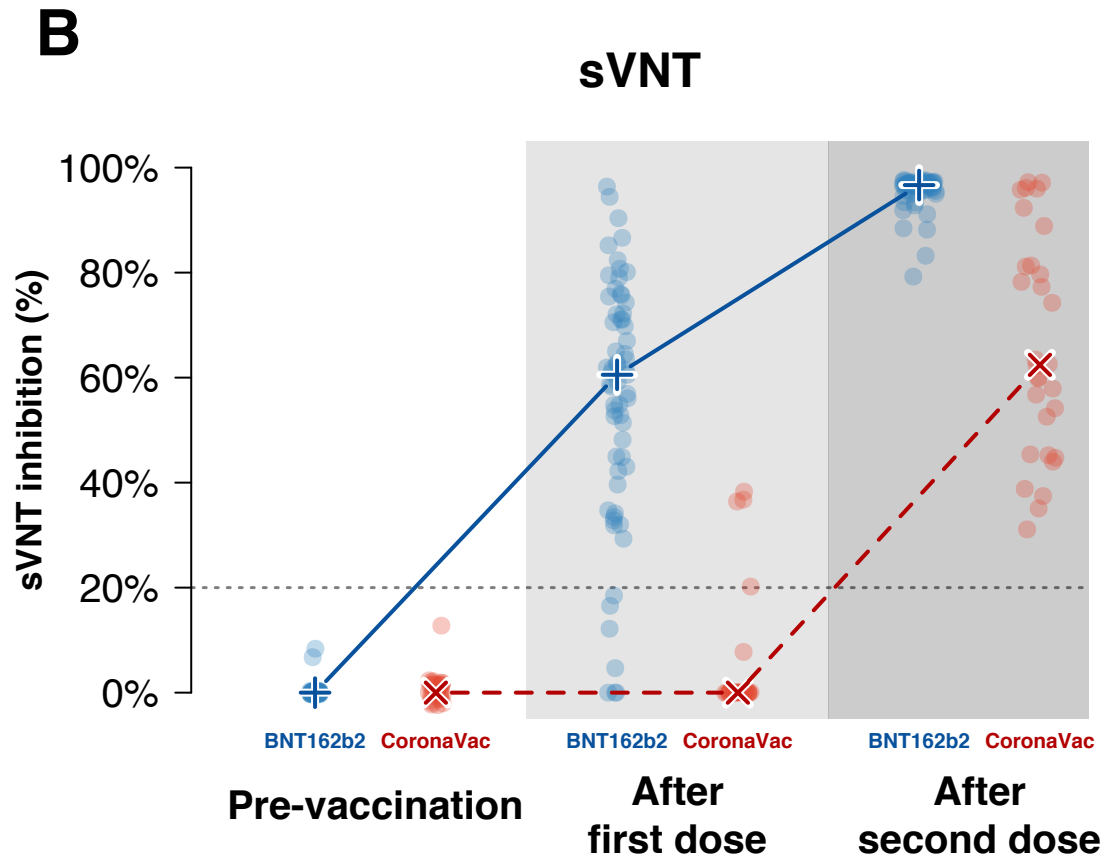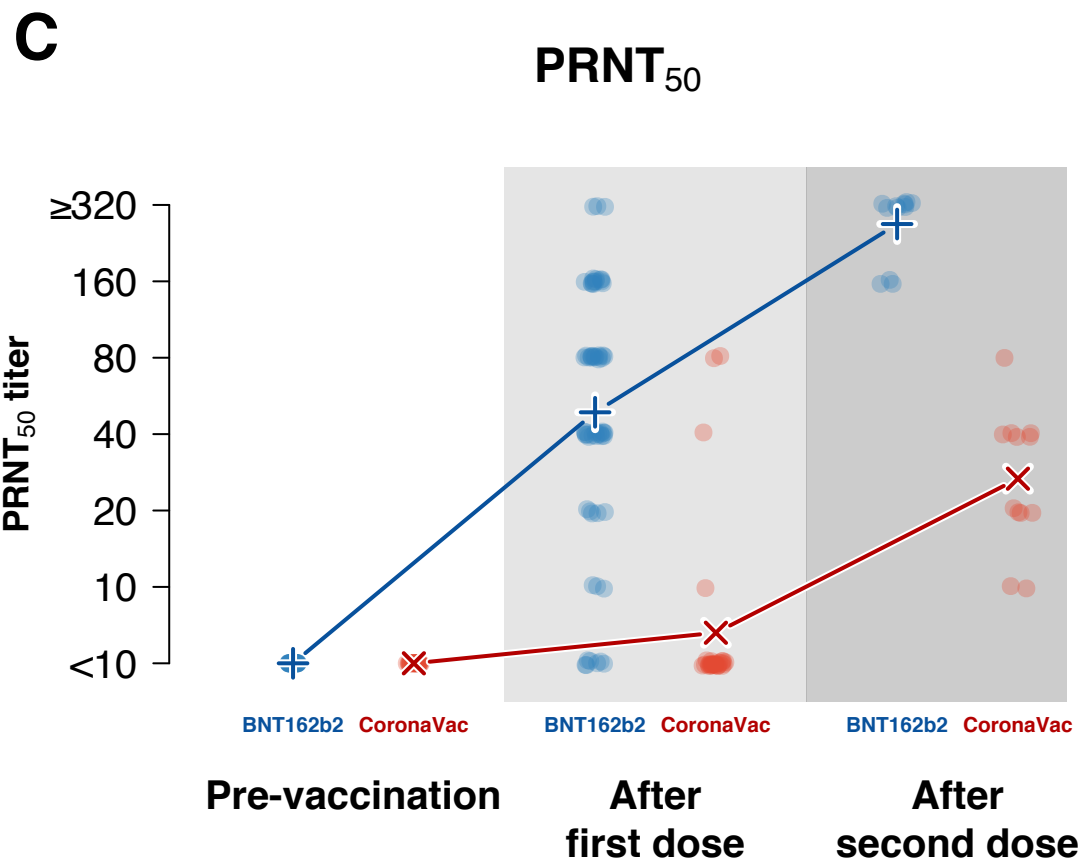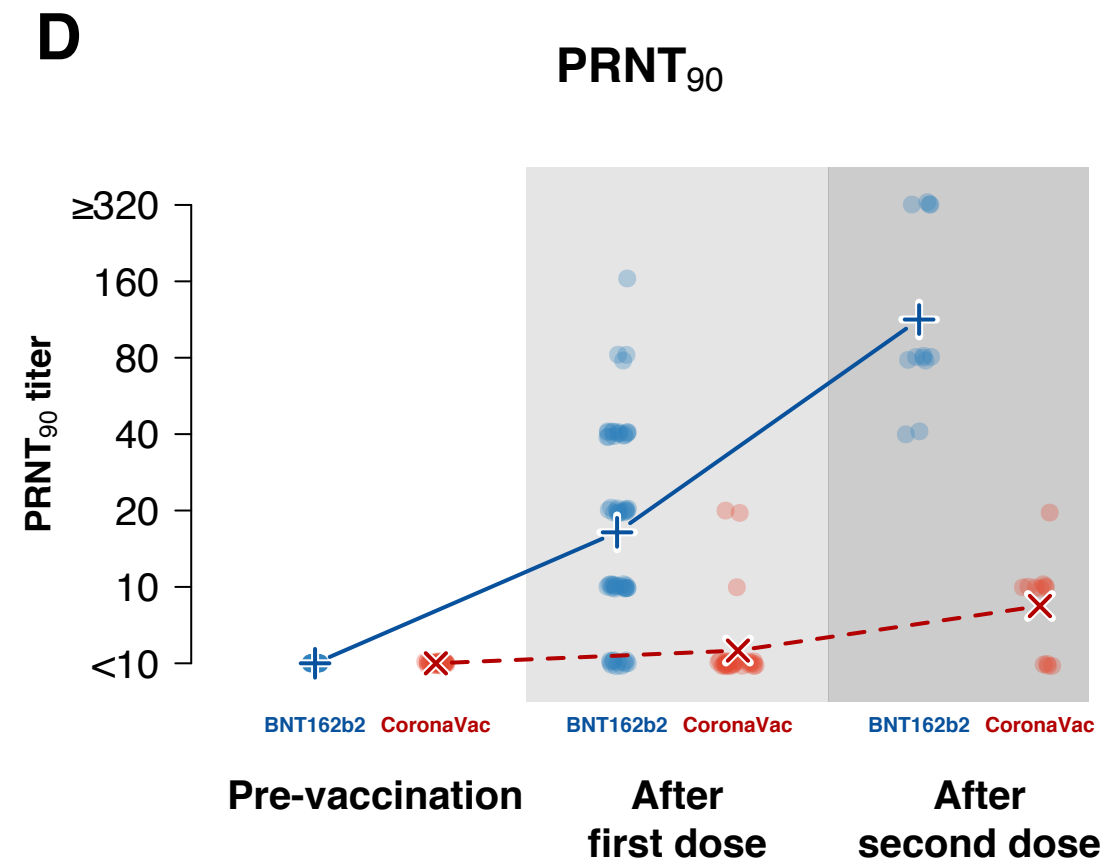

Supplement: mmc1.pdf [file mmc1.pdf]
